# Supplementary material for: Predictive performance of multi-model ensemble forecasts of COVID-19 across European nations
Source: eLife. 2023 Apr 21;12:e81916. doi: 10.7554/eLife.81916 (PMC10238088; doi:10.7554/eLife.81916)
Supplement: Supplementary file 1. [file elife-81916-supp1.csv]

Section of manuscript	Item	Checklist item	Reported on page
Title/Abstract	1	Describe the study as forecast or prediction research in at least the title or abstract	1
Introduction	2	Define the purpose of study and forecasting targets	4
Methods	3	Fully document the methods	4,5,6,7,8
Methods	4	Identify whether the forecast was performed prospectively, in real time, and/or retrospectively	5
Methods	5	Explicitly describe the origin of input source data, with references	5
Methods	6	Provide source data with publication, or document reasons as to why this was not possible	see Github epiforecasts/euro-hub-ensemble
Methods	7	Describe input data processing procedures in detail	5,6
Methods	8	State and describe the model type, and document model assumptions, including references	5,6, Supplement Table 1
Methods	9	Make the model code available, or document the reasons why this was not possible	see Github epiforecasts/euro-hub-ensemble
Methods	10	Describe the model validation, and justify the approach	5,6
Methods	11	Describe the forecast accuracy evaluation method used, with justification	6,7
Methods	12	Where possible, compare model results to a benchmark or other comparator model, with justification of comparator choice	6,7
Methods	13	Describe the forecast horizon, with justification of its length	5
Results	14	Present and explain uncertainty of forecasting results	8,9,10,11,12
Results	15	Briefly summarize the results in nontechnical terms, including a nontechnical interpretation of forecast uncertainty	12,13,14
Results	16	If results are published as a data object, encourage a time-stamped version number	see Github epiforecasts/euro-hub-ensemble
Discussion	17	Describe the weaknesses of the forecast, including weaknesses specific to data quality and methods	12,13,14
Discussion	18	If the research is applicable to a specific epidemic, comment on its potential implications and impact for public health action and decision-making	14,15
Discussion	19	If the research is applicable to a specific epidemic, comment on how generalizable it may be across populations	15
